# Supplementary material
Source: PubMed Central journal article supplement (PMC3904273)
Supplement: peds.2013-1632_peds.2013-1632SupplementaryData.pdf [file peds.2013-1632_peds.2013-1632SupplementaryData.pdf]

## Supplemental Information

**SUPPLEMENTAL TABLE 4** Search Strategies

|                                          |                                                                                                                                                                                                                                                                                                                                                                                                                                                                                   |
|------------------------------------------|-----------------------------------------------------------------------------------------------------------------------------------------------------------------------------------------------------------------------------------------------------------------------------------------------------------------------------------------------------------------------------------------------------------------------------------------------------------------------------------|
| PubMed                                   | (cortisol[MeSH] OR hypothalamic pituitary adrenal axis[Title/Abstract] cortisol[Title/Abstract] OR hydrocortisone[Title/Abstract]) AND (randomized controlled trials as topic[MeSH] OR randomized controlled trial[MeSH] OR early intervention[MeSH] OR intervention study[MeSH] or intervention[Title/Abstract]) AND (infant[MeSH] OR child[Mesh] OR adolescent[MeSH]) AND English[lang] NOT (Editorial[ptyp] OR Letter[ptyp] OR Practice Guideline[ptyp] OR Case Reports[ptyp]) |
| EBSCO Search: PsycInfo, ERIC, and CINAHL | (intervention OR "randomized controlled trial" OR "randomized control trial") AND "cortisol"                                                                                                                                                                                                                                                                                                                                                                                      |
| Database                                 | Limiters Applied                                                                                                                                                                                                                                                                                                                                                                                                                                                                  |
| PsycINFO                                 | Language: English; age groups: childhood (birth–12 years), neonatal (birth–1 month), infancy (2–23 months), preschool age (2–5 years), school age (6–12 years), adolescence (13–17 years); population group: human                                                                                                                                                                                                                                                                |
| CINAHL with Full Text                    | Human; language: English; age groups: infant; newborn: birth–1 month; infant: 1–23 months; child: preschool, 2–5 years; child: 6–12 years; adolescent: 13–18 years; all infants; all children                                                                                                                                                                                                                                                                                     |
| ERIC                                     | N/A                                                                                                                                                                                                                                                                                                                                                                                                                                                                               |

N/A, not applicable.
